# Supplementary material
Source: MDPI journal article supplement (https://www.mdpi.com/2073-4352/14/2/147)
Supplement: s1 [file s1]

Supplementary materials for the article

# Properties of Antiferroelectric Mixtures Differing in the Amount of Added Racemate

Magdalena Urbańska <sup>1,\*</sup> and Dorota Dardas <sup>2</sup>

<sup>1</sup> Institute of Chemistry, Military University of Technology, ul. Sylwestra Kaliskiego 2, 00-908 Warsaw, Poland

<sup>2</sup> Institute of Molecular Physics, Polish Academy of Sciences, ul. Mariana Smoluchowskiego 17, 60-179 Poznań, Poland

\* Correspondence: magdalena.urbanska@wat.edu.pl

## Mass Spectra of Mesogens

The purity of the liquid crystalline enantiomers/racemate was recorded using a Shimadzu prominence chromatograph. A strong molecular ion with a captured sodium atom  $[M + Na]^+$  and hydrogen atom  $[M + H]^+$  was observed (see Figures S1–S3).

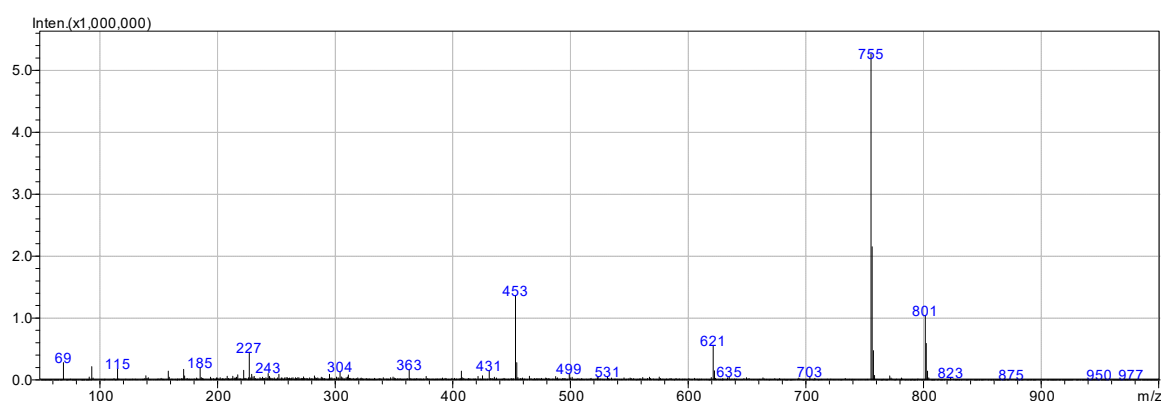

**Figure S1.** Mass spectrum of the enantiomer 1.(S).

Purity: 99.9% (HPLC); m.p: 28.1°C.

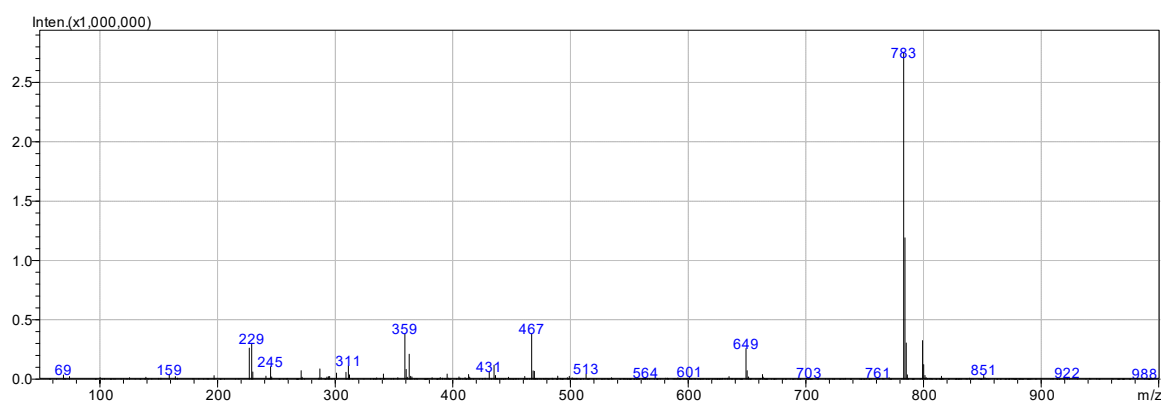

**Figure S2.** Mass spectrum of the enantiomer 2.(S).

Purity: 99.0% (HPLC); m.p.: 37.4°C.

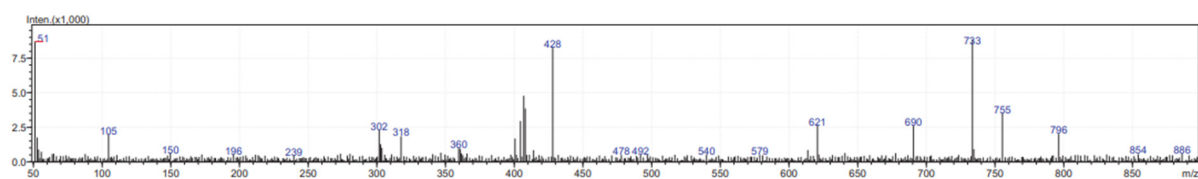

**Figure S3.** Mass spectrum of the racemate 3.(R,S).

Purity: 99.5% (HPLC); m.p.: 39.1°C.
